# Supplementary material for: Integrating single-cobalt-site and electric field of boron nitride in dechlorination electrocatalysts by bioinspired design
Source: PubMed Central journal article supplement (PMC7803959; doi:10.1038/s41467-020-20619-w), 2021-01-12
Supplement: 41467_2020_20619_MOESM2_ESM.pdf [file 41467_2020_20619_MOESM2_ESM.pdf]

## Description of Additional Supplementary Files

File Name: Supplementary Movie 1

Description: X-ray tomography 3D reconstruction of Co SAs/BCN
